# Supplementary material for: Differentiation of cognate bacterial communities in thermokarst landscapes: implications for ecological consequences of permafrost degradation
Source: Copernicus journal article supplement (doi:10.5194/bg-2023-85), 2023-05-23
Supplement: Supplementary file [file bg-2023-85-AC1-supplement.pdf]

Dear Editor and Reviewers,

Thank you for dedicating your time to review our manuscript and providing us with valuable feedback. We are grateful for the positive comments highlighting the potential significance and interest of our study. We highly value all the critical comments, as they have greatly contributed to the improvement of our work.

In response to the reviewer' comments, we have thoroughly revised the manuscript. We have carefully considered each comment and incorporated the necessary changes and refinements throughout the revised manuscript. To facilitate your review, we have provided detailed responses to each comment in blue color below. Additionally, you can refer to the tracked changes in the manuscript for a comprehensive overview of the revisions made.

Once again, we sincerely appreciate your time and expertise in evaluating our work, and we hope that the revisions have strengthened the manuscript in terms of clarity, accuracy, and overall quality.

Best Regards,

Ze Ren on behalf of all co-authors.

**RC1: 'Comment on bg-2023-85', Dajana Radujkovic, 29 Jun 2023**

**General comments:**

The study by Ren et al. investigates bacterial diversity and community composition as well as potential deterministic and stochastic processes that shape bacterial communities in three types of thermokarst habitats across the Qinghai-Tibet Plateau. The manuscript is clear and concise, the figures are informative and relevant, and overall the study is an important contribution to understanding bacterial community composition and assembly processes in thermokarst landscapes.

We sincerely appreciate your positive feedback on the potential importance of our study about bacterial diversity and community assembly in thermokarst habitats across the Qinghai-Tibet Plateau. We have carefully considered your comments and suggestions, and incorporated relevant revisions into the manuscript to further improve its clarity and scientific contribution. Thank you for your valuable feedback.

However, the manuscript would benefit from a more detailed explanation of certain analyses in the method section, given that some relevant information is lacking.

We appreciate your suggestion and understand the importance of providing sufficient detail on the analyses and methods. In response, we have revised the method section to include more explicit descriptions. Please referring to the responses below to the specific comments and the revised manuscript.

Moreover, the discussion could be expanded to give a more thorough interpretation of the results. Currently, the discussion is often very general and does not address some of the interesting findings of this study concretely. Below are more specific comments and examples.

We thank your comments on highlighting the need for a more comprehensive discussion that addresses the specific and interesting findings of our study. In response, we have expanded the discussion section to provide a more in-depth interpretation of the results. Please referring to the responses below to the specific comments and the revised manuscript.

**Specific comments:**

L139: The paragraph about PCR and sequencing is missing some important detail that would enable the reader to understand what exactly was done and why certain choices were made. First, even though PCR preparation, PCR conditions were described in a previous study, it would be good to describe them briefly in this paper. Moreover, could the authors describe other steps of library preparation, how were the PCR products cleaned and quantified? Were paired-end reads sequenced, and how many base pairs? The sequences were trimmed at the end; what was the length of the sequences, and what was the trim length? How were the low-quality sequences detected, and what was the threshold used? Which version of the Silva database was used (release date)? How were the sequences normalized, and why was this particular threshold used (24.251)?

Thanks for pointing out these omissions. We agree that providing a more comprehensive description of the PCR and sequencing protocols is necessary to ensure clarity and transparency. We have carefully revised the methods section to provide a more detailed description of the PCR and sequencing protocols.

For example, we added: “PCRs were conducted in 25 µl reaction mixture containing 2.5 µl of TransStart buffer, 2 µl of dNTPs, 1 µl of each primer, 0.5 µl of TransStart Taq DNA polymerase, and 20 ng template DNA. The PCR reactions were conducted on a thermal cycler (ABI GeneAmp® 9700, USA) using the followed procedure: initial denaturation at 94 °C for 5 min, 24 cycles of denaturation at 94 °C for 30 s followed by annealing at 56 °C for 30 s and extension at 72 °C for 20 s, and a final extension at 72 °C for 5 min.”, “DNA libraries were verified on 2% agarose gels and quantified using a Qubit 4 Fluorometer

(Thermo Fisher Scientific, Waltham, USA).”, “The sequences were subjected to the following denoising criteria: sequences with ambiguous or homologous regions, as well as those below 200 bp in length, were excluded; sequences with at least 75% of bases having a quality score above Q20 were retained; and chimeric sequences were identified and eliminated. All sequences from extraction blanks were removed.”, “The effective sequences were grouped into Operational Taxonomic Units (OTUs) using a 97% sequence similarity threshold and annotated the taxonomic classifications against the SILVA 138 database (released on 02-Nov-2020)”, “The singletons were removed, and the sequences were rarefied to the lowest number of sequences per sample (24,251 sequences) to eliminate the bias from the sampling effort.”

Please referring to the revised manuscript for more details.

L155: Analyses: In some cases, multiple tests were performed (e.g. correlation tests). Did the authors apply any correction of P values for multiple testing?

We did the correction of P values using the FDR method (Benjamini and Hochberg, 1995). In the revision, we clarified in the methods section.

✧ Benjamini Y, Hochberg Y. 1995. Controlling the false discovery rate: a practical and powerful approach to multiple testing. *Journal of the Royal Statistical Society: Series B (Methodological)*, 57: 289-300.

L176: Could the authors provide more details about the construction of SEM? How were the paths constructed, and why? The path construction should have some theoretical rationale. Did the authors assess the fit of SEM, and which parameters were used for this? Which package was used to construct SEM?

We apologize for the lack of clarity regarding the construction of the SEM in our initial manuscript. To address this concern, we have provided a more detailed explanation in the methods section regarding the construction of the paths in the SEM and the theoretical rationale behind them: “Structural equation modeling (SEM) was conducted to assess the relationships among location (including latitude, longitude, and elevation), climate (including mean annual temperature and mean annual precipitation), and physicochemical variables (including pH, conductivity, nutrients concentrations and stoichiometric ratios) of each habitat (permafrost soil, lake sediment, and lake water), as well as their bacterial communities (PBCs, SBCs, and WBCs). In model building, the SEM incorporated prior knowledges: (a) location and climate factors potentially influence all the studied bacterial communities, (b) physicochemical factor of each habitat potentially influences the corresponding bacterial communities, and (c) permafrost soil potentially influences thermokarst lake sediment and water, while lake sediment and water interact with each other.”

In our study, we did assess the fit of the SEM. In the revision, we clarified in the methods that: “SEM was constructed using the lavaan package (Rosseel, 2012). The fit of SEM was assessed using standard indices, including chi-square ( $\chi^2$ ), goodness-of-fit index (GFI), comparative fit index (CFI), root mean square residual (RMR), and root mean squared error of approximation (RMSEA) (Hu and Bentler, 1999; Barrett, 2007).” In the figure 5b of SEM, we added “ $\chi^2 = 37.867$ ,  $df = 11$ ,  $GFI = 0.913$ ,  $CFI = 0.867$ ,  $RMR = 0.269$ ,  $RMSEA = 0.023$ ”

- ✧ Barrett, P.: Structural equation modelling: Adjudging model fit, *Pers. Individ. Differ.*, 42, 815-824, doi:10.1016/j.jpaid.2006.09.018, 2007.
- ✧ Hu, L. and Bentler, P. M.: Cutoff criteria for fit indexes in covariance structure analysis: Conventional criteria versus new alternatives, *Structural equation modeling*, 6, 1-55, doi:10.1080/10705519909540118, 1999.
- ✧ Rosseel, Y.: lavaan: An R Package for Structural Equation Modeling, *J. Stat. Softw.*, 48, 1-36, doi:10.18637/jss.v048.i02, 2012.

L348-351: Could the authors explain in more detail how this analysis was performed? E.g. how were homogeneous and heterogeneous selection determined?

In the methods section, we clarified as:  $\beta_{NTI}$  values  $<-2$  or  $>+2$  indicate signals for heterogeneous selection and homogenous selection, respectively. The values with  $-2 < \beta_{NTI} < 2$  and  $RC_{Bray} < -0.95$  indicate homogeneous dispersal, while  $-2 < \beta_{NTI} < 2$  and  $RC_{Bray} > 0.95$  indicate dispersal limitation. The values with  $-2 < \beta_{NTI} < 2$  and  $-0.95 < RC_{Bray} < 0.95$  indicate “undominated”.

L433-435: Could the authors provide some possible explanations for this?

In the revision, we added more possible explanations: “The significantly lower mean SES.MNTD for PBCs indicate that bacterial communities in permafrost soil were more closely phylogenetically clustered and suffered stronger environmental filtering than those in lake sediment and water (Langenheder et al., 2017), consistent with the observation that PBCs had lower beta diversity than SBCs and WBCs. SES.MNTD is sensitive to changes in lineage close to the phylogenetic tips (Kembel et al., 2010). The higher SES.MNTD observed for SBCs and WBCs suggest the possibility that the bacteria in lake sediment and water exhibit a substantial divergence in the co-occurring species, and thermokarst lakes have experienced colonization by bacterial species originating from distinct clades or lineages from external sources following permafrost thaw (Webb et al., 2002; Stegen et al., 2013).”

- ✧ Kembel, S. W., Cowan, P. D., Helmus, M. R., Cornwell, W. K., Morlon, H., Ackerly, D. D., Blomberg, S. P. and Webb, C. O.: Picante: R tools for integrating phylogenies and ecology, *Bioinformatics*, 26, 1463-1464, doi:10.1093/bioinformatics/btq166, 2010.

- ✧ Langenheder, S., Wang, J., Karjalainen, S. M., Laamanen, T. M., Tolonen, K. T., Vilmi, A. and Heino, J.: Bacterial metacommunity organization in a highly connected aquatic system, *FEMS Microbiol. Ecol.*, 93, fiw225, doi:10.1093/femsec/fiw225, 2017.
- ✧ Stegen, J. C., Lin, X., Fredrickson, J. K., Chen, X., Kennedy, D. W., Murray, C. J., Rockhold, M. L. and Konopka, A.: Quantifying community assembly processes and identifying features that impose them, *The ISME Journal*, 7, 2069-2079, doi:10.1038/ismej.2013.93, 2013.
- ✧ Webb, C. O., Ackerly, D. D., Mcpeck, M. A. and Donoghue, M. J.: Phylogenies and community ecology, *Annual review of ecology and systematics*, 33, 475-505, 2002.

L441-447: Instead of repeating the results in detail, it would perhaps be more useful to focus on discussing these results and interpreting what they mean for each habitat. For instance, the general discussion about dispersal limitation was interesting, but more specifically for the study, it would be interesting to discuss, e.g. why heterogeneous selection influenced PBCs much more strongly than WBCs and why dispersal limitation was the most important for sediments.

In the revision, we deleted some detail description of the results. In addition, we added more discussions about the differences of community assemblage. For example, we added: “Long-term changes in thermokarst lakes result in homogenized habitats and consequently strong homogenous selection on bacterial communities (Ning et al., 2019). In contrast, permafrost soil is a highly heterogeneous environment across spatial scales (Etzelmüller, 2013; Nitzbon et al., 2021), creating a wide range of habitats which can impose strong heterogeneous selection pressures on bacterial communities. Furthermore, permafrost soil is characterized by limited nutrient availability due to the frozen state of organic matters (Beermann et al., 2017; Zhang et al., 2023), while lake water offers a more diverse and abundant array of dissolved organic compounds and nutrients. As a result, bacterial communities in permafrost soil might be more sensitive to variations in resource availability, rendering them more strongly influenced by heterogeneous selection”, “Furthermore, geographical barriers, exemplified by prominent mountain ranges like the Tanggula Mountains, Kunlun Mountains, Nyenchen Tanglha Mountains, and Bayan Har Mountains, serve as impediments to the dispersal of both macro- and microorganisms (Wan et al., 2016; Yu et al., 2019; Ren et al., 2022c)”, and “Particularly in lake sediment, where bacterial communities are more isolated over distances and will not disperse as far as those in lake water and permafrost soil, resulting in strong influence of dispersal limitation (Martiny et al., 2006; Xiong et al., 2012).”

- ✧ Beermann, F., Langer, M., Wetterich, S., Strauss, J., Boike, J., Fiencke, C., Schirrmeister, L., Pfeiffer, E. M. and Kutzbach, L.: Permafrost thaw and liberation of inorganic nitrogen in Eastern Siberia, *Permafrost and Periglacial Processes*, 28, 605-618, 2017.
- ✧ Etzelmüller, B.: Recent advances in mountain permafrost research, *Permafrost and Periglacial Processes*, 24, 99-107, 2013.

- ✧ Martiny, J., Bohannan, B., Brown, J. H., Colwell, R. K., Fuhrman, J. A., Green, J. L., Horner-Devine, M. C., Kane, M., Krumins, J. A., Kuske, C. R., Morin, P. J., Naeem, S., Ovreas, L., Reysenbach, A. L., Smith, V. H. and Staley, J. T.: Microbial biogeography: putting microorganisms on the map, *Nat. Rev. Microbiol.*, 4, 102-112, doi:10.1038/nrmicro1341, 2006.
- ✧ Ning, D., Deng, Y., Tiedje, J. M. and Zhou, J.: A general framework for quantitatively assessing ecological stochasticity, *Proceedings of the National Academy of Sciences*, 116, 16892-16898, doi:10.1073/pnas.1904623116, 2019.
- ✧ Nitzbon, J., Langer, M., Martin, L. C. P., Westermann, S., Schneider Von Deimling, T. and Boike, J.: Effects of multi-scale heterogeneity on the simulated evolution of ice-rich permafrost lowlands under a warming climate, *The cryosphere*, 15, 1399-1422, doi:10.5194/tc-15-1399-2021, 2021.
- ✧ Ren, Z., Jia, X., Zhang, Y. T., Ma, K., Zhang, C. and Li, X.: Biogeography and environmental drivers of zooplankton communities in permafrost-affected lakes on the Qinghai-Tibet Plateau, *Glob. Ecol. Conserv.*, 38, e02191, doi:10.1016/j.gecco.2022.e02191, 2022.
- ✧ Wan, D. S., Feng, J. J., Jiang, D. C., Mao, K. S., Duan, Y. W., Miede, G. and Opgenoorth, L.: The Quaternary evolutionary history, potential distribution dynamics, and conservation implications for a Qinghai-Tibet Plateau endemic herbaceous perennial, *Anisodus tanguticus* (Solanaceae), *Ecol. Evol.*, 6, 1977-95, doi:10.1002/ece3.2019, 2016.
- ✧ Xiong, J., Liu, Y., Lin, X., Zhang, H., Zeng, J., Hou, J., Yang, Y., Yao, T., Knight, R. and Chu, H.: Geographic distance and pH drive bacterial distribution in alkaline lake sediments across Tibetan Plateau, *Environ. Microbiol.*, 14, 2457-2466, doi:10.1111/j.1462-2920.2012.02799.x, 2012.
- ✧ Yu, H., Favre, A., Sui, X., Chen, Z., Qi, W., Xie, G., Kleunen, M. and van Kleunen, M.: Mapping the genetic patterns of plants in the region of the Qinghai-Tibet Plateau: Implications for conservation strategies, *Diversity & distributions*, 25, 310-324, doi:10.1111/ddi.12847, 2019.
- ✧ Zhang, D., Wang, L., Qin, S., Kou, D., Wang, S., Zheng, Z., Peñuelas, J. and Yang, Y.: Microbial nitrogen and phosphorus co - limitation across permafrost region, *Glob. Change Biol.*, 29, 3910-3923, doi:10.1111/gcb.16743, 2023.

L473: Could this be discussed further?

We revised by reorganizing this paragraph and adding more discussion on the differences of bacterial community assemblage in lake water, sediment, and permafrost soil. Please referring to the previous response.

L494-504: The authors write about the general importance of different environmental factors for bacterial communities but do not go into why certain of these factors were important in this study. Could the authors discuss more specifically why particular environmental factors are important in these different habitats and, even more interestingly, why the environment seems to be more important in PBCs than the other habitats? For instance, in this respect, it could be interesting to discuss the results of SEM.

In the revision, we added more specific discussions: “Compared to permafrost soil and lake water, lake sediment can exhibit more stable physicochemical conditions. However, permafrost soil and lake water experience more dynamic and extreme environmental

changes, which drive the bacterial communities. The results of SEM also in line with bacterial community assembly that deterministic processes had stronger influences on PBCs and WBCs than on SBCs”, “Particularly for bacterial communities in permafrost soil, location and climate have been evidenced as strong factors in shaping microbial communities (Taş et al., 2018; Barbato et al., 2022).”

- ✧ Barbato, R. A., Jones, R. M., Douglas, T. A., Doherty, S. J., Messan, K., Foley, K. L., Perkins, E. J., Thurston, A. K. and Garcia-Reyero, N.: Not all permafrost microbiomes are created equal: Influence of permafrost thaw on the soil microbiome in a laboratory incubation study, *Soil Biology and Biochemistry*, 167, 108605, doi:<https://doi.org/10.1016/j.soilbio.2022.108605>, 2022.
- ✧ Taş, N., Prestat, E., Wang, S., Wu, Y., Ulrich, C., Kneafsey, T., Tringe, S. G., Torn, M. S., Hubbard, S. S., Jansson, J. K., Pacific Northwest National Laboratory Pnnl, R. W. U. S. and Lawrence Berkeley National Laboratory Lbnl, B. C. U. S.: Landscape topography structures the soil microbiome in arctic polygonal tundra, *Nat. Commun.*, 9, 777-13, doi:[10.1038/s41467-018-03089-z](https://doi.org/10.1038/s41467-018-03089-z), 2018.
